# Supplementary material for: A1C Combined With Glycated Albumin Improves Detection of Prediabetes in Africans: The Africans in America Study
Source: Oxford University Press journal article supplement (doi:10.2337/dc15-1699), 2015-12-17

SUPPLEMENTARY DATA

**Supplementary Table 1. Characteristics of African immigrants with 2h Glucose $\geq$ 11.1 mmol/L**

**1A: African immigrants with Diabetes\***

**1B: African immigrants with Prediabetes\***

| Subj                                                              | Age (y) | Sex | BMI (kg/m <sup>2</sup> ) | A1C (% ,mmol/mol) | GA (%) | Fructosamine ( $\mu$ mol/L) | Fasting Glucose (mmol/L) | 2h Glucose (mmol/L) |
|-------------------------------------------------------------------|---------|-----|--------------------------|-------------------|--------|-----------------------------|--------------------------|---------------------|
| <b>Table 1A: African immigrants with Diabetes<sup>†</sup></b>     |         |     |                          |                   |        |                             |                          |                     |
| 1                                                                 | 46      | M   | 26.6                     | 6.9 (52)          | 14.87  | 266                         | 6.8                      | 13.2                |
| 2                                                                 | 61      | M   | 21.1                     | 7.3 (56)          | 16.87  | 252                         | 6.7                      | 13.9                |
| 3                                                                 | 35      | M   | 30.5                     | 11.3 (100)        | 26.58  | 359                         | 10.2                     | 17.2                |
| 4                                                                 | 55      | F   | 37.4                     | 8.4 (68)          | 21.04  | 309                         | 10.9                     | 21.3                |
| <b>Table 1B: African immigrants with Prediabetes<sup>†§</sup></b> |         |     |                          |                   |        |                             |                          |                     |
| 1                                                                 | 52      | M   | 32.3                     | 5.9 (41)          | 13.09  | 209                         | 5.2                      | 11.3                |
| 2                                                                 | 28      | M   | 26.7                     | 5.3 (34)          | 13.77  | 242                         | 5.2                      | 11.6                |
| 3                                                                 | 37      | M   | 32.2                     | 5.3 (34)          | 12.89  | 211                         | 5.6                      | 11.8                |
| 4                                                                 | 44      | F   | 28.7                     | 6.0 (42)          | 11.91  | 234                         | 5.9                      | 12.0                |
| 5                                                                 | 44      | M   | 27.1                     | 6.1 (43)          | 14.3   | 243                         | 6.4                      | 12.2                |
| 6                                                                 | 41      | M   | 26.6                     | 6.1 (43)          | 12.98  | 237                         | 6.4                      | 12.9                |
| 7                                                                 | 56      | M   | 31.2                     | 5.5 (37)          | 12.7   | 210                         | 4.7                      | 12.9                |
| 8                                                                 | 50      | M   | 27.4                     | 5.1 (32)          | 15.13  | 231                         | 6.6                      | 13.3                |
| 9                                                                 | 44      | M   | 26.2                     | 5.8 (40)          | 11.09  | 246                         | 3.8                      | 13.9                |
| 10                                                                | 54      | F   | 34.7                     | 6.1 (43)          | 14.53  | 250                         | 5.7                      | 14.5                |
| 11                                                                | 41      | M   | 28.0                     | 5.2 (33)          | 15.22  | 243                         | 6.5                      | 14.7                |

\*Sorted by 2h Glucose

<sup>†</sup>Met at least 2 of the 3 criteria set forth by the ADA for the diagnosis of the DM

<sup>‡</sup>2h glucose $\geq$ 11.1, but did not meet a second criterion for DM, therefore they were classified as having pre-diabetes

<sup>§</sup>A1C, GA, fructosamine, fasting glucose, 2h glucose levels were significantly higher in 1A group than the 1B group, all P<0.05.

SUPPLEMENTARY DATA

Supplementary Table 2. Demographic and Metabolic Characteristics\*

| Parameter                           | Total n=217  | West n=118<br>(55%) | Central n=46<br>(21%) | East n=53<br>(24%) | P-value <sup>†</sup> |
|-------------------------------------|--------------|---------------------|-----------------------|--------------------|----------------------|
| Male (%)                            | 68%          | 69%                 | 70%                   | 64%                | 0.77                 |
| Age (y)                             | 39±10        | 40±11               | 38±10                 | 37±7               | 0.23                 |
| BMI (kg/m <sup>2</sup> )            | 27.6±4.5     | 27.3±4.5            | 28.9±5.2              | 27.0±3.8           | 0.07                 |
| WC (cm)                             | 90±12        | 89±12               | 91±11                 | 92±11              | 0.42                 |
| VAT (cm <sup>3</sup> ) (n=210)      | 102±76       | 96±74               | 110±77                | 108±79             | 0.44                 |
| Married (%)                         | 45%          | 42%                 | 52%                   | 47%                | 0.45                 |
| Median Income (\$)                  | \$35,000     | \$35,000            | \$35,000              | \$45,000           | 0.35                 |
| Health Insurance (%)                | 68%          | 66%                 | 72%                   | 70%                | 0.76                 |
| College Graduate (%)                | 73%          | 71%                 | 76%                   | 74%                | 0.81                 |
| Fasting Glucose (mmol/L)            | 5.0±0.5      | 4.9±0.5             | 5.1±0.6               | 5.0±0.4            | 0.32                 |
| 2h Glucose (mmol/L)                 | 7.2±2.0      | 7.1±2.1             | 7.6±1.9               | 7.2±1.9            | 0.32                 |
| Matsuda Index                       | 7.00±4.51    | 7.46±4.77           | 6.18±4.34             | 6.66±4.05          | 0.22                 |
| Insulinogenic Index                 | 2.42±8.51    | 2.86±11.34          | 1.91±1.75             | 1.84±2.22          | 0.70                 |
| Oral Disposition Index              | 0.39±0.90    | 0.44±1.15           | 0.28±0.24             | 0.35±0.59          | 0.58                 |
| Prediabetes (%)                     | 34% (74/217) | 29% (34/118)        | 43% (20/46)           | 38% (20/53)        | 0.17                 |
| Hemoglobin (g/L)                    | 141±13       | 141±14              | 140±13                | 140±13             | 0.87                 |
| Hematocrit (%)                      | 41.9±3.5     | 42.2±3.7            | 41.7±3.1              | 41.7±3.2           | 0.60                 |
| MCV (fl)                            | 84.5±5.6     | 83.8±5.8            | 84.0±5.1              | 86.3±5.0           | 0.02 <sup>‡</sup>    |
| Variant Hemoglobin (%) <sup>§</sup> | 20% (44/217) | 28% (33/118)        | 15% (7/46)            | 8% (4/53)          | <0.01                |

\* Unless noted otherwise, results available for all 218 participants and presented as mean±SD

<sup>†</sup> Comparisons were by One-way ANOVA for continuous variables and chi-square for categorical.

<sup>‡</sup> Difference between West and East Africans significant at P=0.02

<sup>§</sup> Forty-four of 217 had variant hemoglobin (33 with SCT, 10 with HbC Trait, 1 with HbE trait)

## SUPPLEMENTARY DATA

**Supplementary Table 3. Comparison of Sensitivities for the diagnosis of prediabetes with n=206\* and n=217**

| <b>Sensitivity</b>        | <b>n=206</b> | <b>n=217</b> |
|---------------------------|--------------|--------------|
| <b>A1C</b>                | <b>49%</b>   | <b>50%</b>   |
| <b>Fructosamine</b>       | <b>35%</b>   | <b>41%</b>   |
| <b>Glycated Albumin</b>   | <b>41%</b>   | <b>42%</b>   |
| <b>A1C + Fructosamine</b> | <b>70%</b>   | <b>72%</b>   |
| <b>A1C + GA</b>           | <b>78%</b>   | <b>78%</b>   |

\*The 11 excluded from the n=206 are the individuals with isolated elevated 2h glucose >11.1 mmol/L

SUPPLEMENTARY DATA

Supplementary Figure 1. AUC-ROC Curves for the Identification of Prediabetes by A1C, Fructosamine, and GA\*

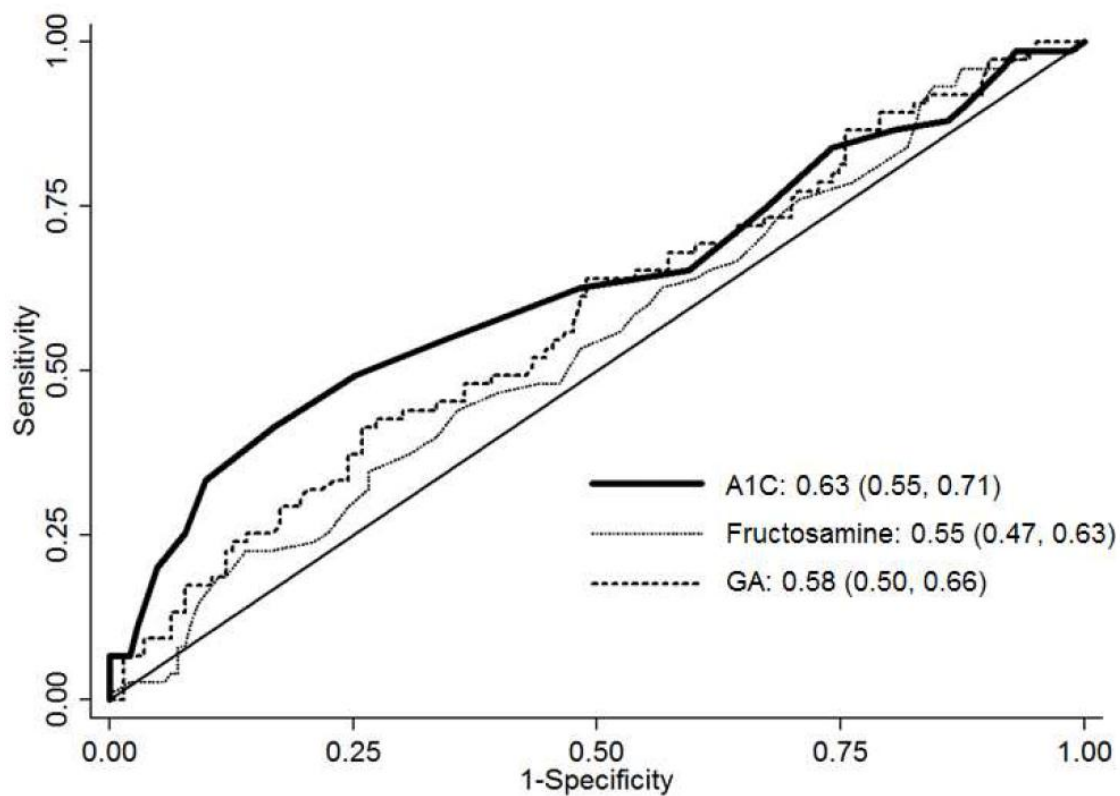

\*P-value for comparison of A1C, fructosamine, and GA: 0.36

SUPPLEMENTARY DATA

Supplementary Figure 2.

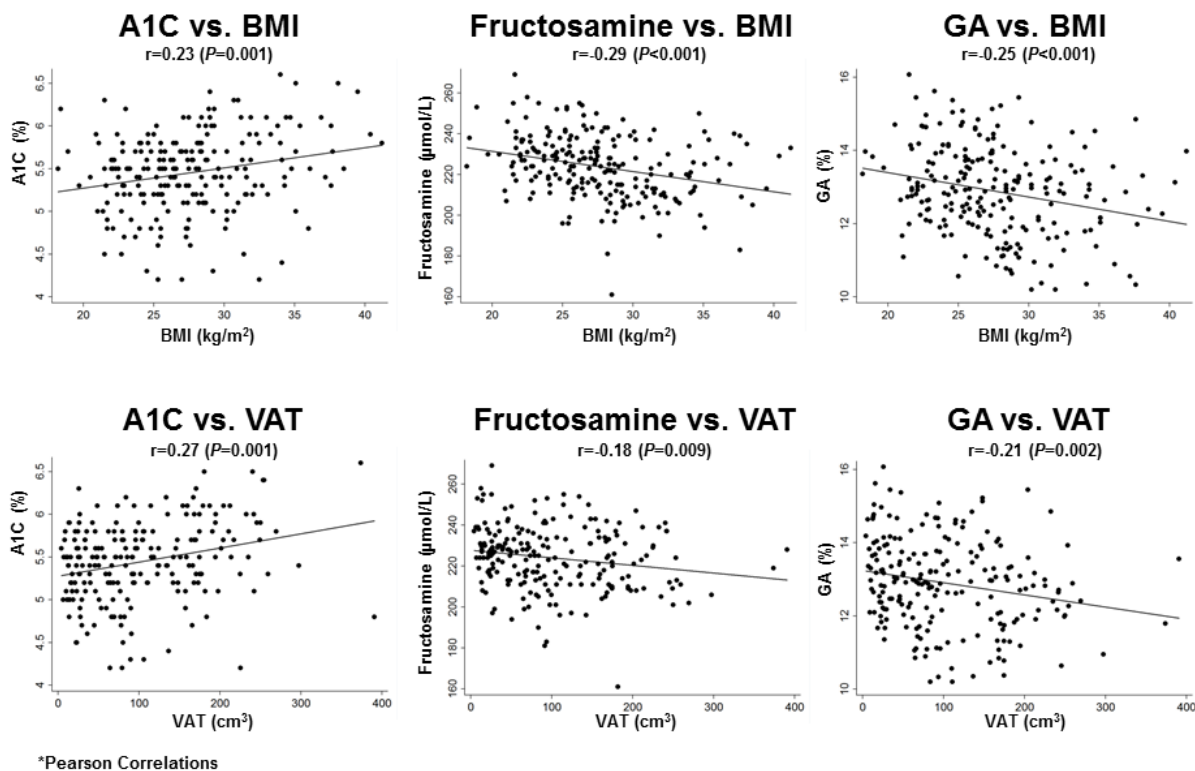

Supplement: dc151699supplementarydata.pdf [file dc151699supplementarydata.pdf]
